RESEARCH ARTICLE

# Neural correlates of creative insight: Amplitude of low-frequency fluctuation of resting-state brain activity predicts creative insight

Jiabao Lin<sup>1,2</sup>, Xuan Cui<sup>1,2</sup>, Xiaoying Dai<sup>1,2</sup>, Yajue Chen<sup>1,2</sup>, Lei Mo<sup>1,2\*</sup>

**1** Center for Studies of Psychological Application, Guangdong Key Laboratory of Mental Health and Cognitive Science, School of Psychology, South China Normal University, Guangzhou, China, **2** Guangdong Provincial Key Laboratory of Mental Health and Cognitive Science, South China Normal University, Guangzhou, China

☞ These authors contributed equally to this work.

\* [molei@m.scnu.edu.cn](mailto:molei@m.scnu.edu.cn)

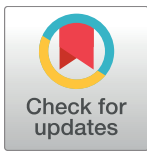

**OPEN ACCESS**

**Citation:** Lin J, Cui X, Dai X, Chen Y, Mo L (2018) Neural correlates of creative insight: Amplitude of low-frequency fluctuation of resting-state brain activity predicts creative insight. PLoS ONE 13(8): e0203071. <https://doi.org/10.1371/journal.pone.0203071>

**Editor:** Kewei Chen, Banner Alzheimer's Institute, UNITED STATES

**Received:** March 17, 2018

**Accepted:** August 14, 2018

**Published:** August 30, 2018

**Copyright:** © 2018 Lin et al. This is an open access article distributed under the terms of the [Creative Commons Attribution License](https://creativecommons.org/licenses/by/4.0/), which permits unrestricted use, distribution, and reproduction in any medium, provided the original author and source are credited.

**Data Availability Statement:** All relevant data are within the paper and its Supporting Information files.

**Funding:** This work was supported by grants from the National Social Science Foundation of China (Grant NO.14ZDB159 URL:<http://www.npopss-cn.gov.cn/>) and Project of the Key Institute of Humanities and Social Sciences, Ministry of Education, China (Grant NO.16JJD880025 URL:<https://www.sinoss.net/>). The funders had no role in study design, data collection and analysis,

## Abstract

Creative insight has attracted much attention across cultures. Although previous studies have explored the neural correlates of creative insight by functional magnetic resonance imaging (fMRI), little is known about intrinsic resting-state brain activity associated with creative insight. In the present study, we used amplitude of low-frequency fluctuation (ALFF) as an index in resting-state fMRI (rs-fMRI) to identify brain regions involved in individual differences in creative insight, which was measured by the response time of creative Chinese character chunk decomposition. Our results showed that ALFF in the superior frontal gyrus (SFG) positively predicted creative insight, while ALFF in the middle cingulate cortex/insula cortex (MCC/IC), superior temporal gyrus/angular gyrus (STG/AG), anterior cingulate cortex/caudate nucleus (ACC/CN), and culmen/declive (CU/DC) negatively predicted creative insight. Moreover, these findings indicate that spontaneous brain activity in multiple regions related to breaking mental sets, solutions exploring, evaluation of novel solutions, forming task-related associations, and emotion experience contributes to creative insight. In conclusion, the present study provides new evidence to further understand the cognitive processing and neural correlates of creative insight.

## Introduction

Creative insight is a sudden comprehension that can lead to a new interpretation of a situation and yield the solution to a problem [1–4]. The importance of creative insight has long been demonstrated and creative insight contributes a lot to problem solving, artistic performance, and scientific innovation [5–7]. Therefore, creative insight is a hot topic of intense study in multiple fields. Previous behavioral studies have investigated the characteristics of creative insight, including influencing factors [6, 8], phases [9], and cognitive mechanism [10]. However, the precise neural correlates of creative insight remain poorly understood.

decision to publish, or preparation of the manuscript.

**Competing interests:** The authors have declared that no competing interests exist.

**Abbreviations:** fMRI, functional magnetic resonance imaging; rs-fMRI, resting-state fMRI; ALFF, amplitude of low-frequency fluctuation; SFG, superior frontal gyrus; MCC, middle cingulate cortex; IC, insula cortex; STG, superior temporal gyrus; AG, angular gyrus; ACC, anterior cingulate cortex; CN, caudate nucleus; CU, culmen; DC, declive; IFG, inferior frontal gyrus; MFG, middle frontal gyrus; BOLD, blood oxygenation level-dependent; CCDL, creative chunk decomposition-low level; CCDH, creative chunk decomposition-high level; RT, response time; MNI, Montreal Neurological Institute; FWHM, full width at half maximum; FFT, fast Fourier transform; CR, correct rate.

Recently, several task-based functional magnetic resonance imaging (fMRI) studies have explored the neural correlates of creative insight. For instance, in an fMRI study, Jung-Beeman et al. [7] used a type of problem called compound remote associates (CRA) to investigate the neural correlates of creative insight. The CRA problem consists of three words (e.g., pine, crab, sauce), and participants were instructed to think of a single word (e.g., apple) that can form compound phrases (e.g., pineapple, crabapple, and applesauce) with each of the three problem words. This problem can be solved by insight or analytic thinking. The author found that insight solutions were associated with brain activity in superior temporal gyrus (STG). Using a similar remote association task, Subramaniam et al. [11] detected that anterior cingulate cortex (ACC) showed sensitivity to creative insight. In another type of insight problem solving (e.g., solving Chinese riddles), Qiu et al. [12] found that the inferior frontal gyrus (IFG), middle frontal gyrus (MFG) and precuneus were involved in the creative insight. And Zhao et al. [13] detected that the insight condition activated the regions of ACC and MFG. Moreover, with chunk decomposition task, a specific task to study the creative insight, several studies showed that superior frontal gyrus (SFG), IFG, and inferior parietal lobule had greater activations in the creative insight condition [14–16]. These findings indicated that the lateral prefrontal cortex, STG, and ACC may be important for creative insight in a particular task. However, task-related fMRI studies have an obvious drawback that a particular task only activates particular regions. Thus, it was necessarily to elucidate the intrinsic brain mechanisms of creative insight, which tends not to be task-specific.

Previous studies indicated that systematic and stable intrinsic brain activity, especially for the resting-state brain activity, were associated with aspects of personality, intelligence, cognition processes, and neurological disorder [17–22]. For example, Kumari et al. [17] examined the neural correlates of personality dimension of introversion-extraversion, assessed with the Eysenck Personality Questionnaire, and found that introversion-extraversion scores were negatively associated with resting-state fMRI (rs-fMRI) signals in the thalamus. An EEG study showed that general intelligence was correlated with faster processing times in frontal cortex [18]. Another rs-fMRI study indicated that brain regions within the default mode network typically showed deactivations during goal-directed tasks [21]. Moreover, altered brain activity in children with attention deficit hyperactivity disorder was revealed by rs-fMRI [19]. Thus, these findings suggest the possibility that resting-state neural activity may also be correlated with insightful problem solving. However, few studies have focused on the linkage between the insightful problem-solving and intrinsic brain activity.

Amplitude of low-frequency fluctuation (ALFF) of the blood oxygenation level-dependent (BOLD) signal in the rs-fMRI was considered to be physiologically meaningful and related to spontaneous neural activity [23], and the ALFF measures the total power of a given time course within a specific frequency range (e.g., 0.01–0.08 Hz), with high test-retest reliability [24]. Previous studies had defined ALFF as an effective index to reflect the neural activity in the resting state [23, 25, 26]. For example, Huang et al. [23] found that schizophrenia patients exhibited significantly higher ALFF in the bilateral putamen compared to the healthy controls. Yin et al. [25] detected that patients with posttraumatic stress disorder showed decreased ALFF values in right lingual gyrus and insula than the healthy control. Han et al. [26] found that compared to controls, the amnesic mild cognitive impairment patients had decreased ALFF values in the posterior cingulate cortex and hippocampus. Therefore, a standard measure of ALFF was used to explore the neural basis of creative insight in this research.

Chunk decomposition refers to decomposing familiar patterns into basic elements so that they can be reorganized in a novel and meaningful manner, suggesting the possibility for solving problems which seem impossible [14]. Previous studies have confirmed that chunk decomposition is a specific form of insightful problem-solving and reflects feature of human

creativity [8, 14, 15, 27–32]. The matchstick arithmetic problem was first used to investigate chunk decomposition [33]. Participants were asked to move only one stick to transform the fault arithmetic statement into a true equation. Results showed that participants were easy to transform the equation ‘IV = III+III’ to ‘VI = III+III’, which was defined as non-insightful problem-solving. However, participants were difficult to transform the equation ‘XI = III+III’ to ‘VI = III + III’, which was defined as insightful problem-solving. Since the matchstick arithmetic problem cannot provide a sufficient variety of trials for neuroimaging study, researchers developed a new chunk decomposition task using Chinese characters as the materials, which required people to transform a Chinese character into another by removing some parts [14, 34]. Similarly, the radical-level decomposition was easy for participants and defined as non-insightful problem-solving. While the stroke-level chunk decomposition was novel for participants and defined as insightful problem-solving. Details of the Chinese character chunk decomposition task have been reported elsewhere [14, 31, 34].

In this study, we used a revised Chinese character chunk decomposition task as the insight problem-solving task to explore the neural mechanisms of creative insight. Considering the experimental material difficulty may potentially influence the performance of participants, we designed two types of creative Chinese character chunk decomposition varying in difficulty: creative chunk decomposition-low level (CCDL) and creative chunk decomposition-high level (CCDH). The CCDL was defined as requiring participants to transform a Chinese character into a new one by removing a particular part, such as a stroke, which was novel to participants but could be solved with a high probability of success. While in the CCDH condition, participants were asked to transform a character into another one by removing an intact character, like an isolated character, which was much more novel to participants and could be solved with a low probability of success. Previous studies have confirmed that chunk decomposition was a specific form of insightful problem-solving through behavioral data such as response time (RT) and RT could partly reflect the degree of creative insight [14, 33]. For each participant, to reduce the impact of material difficulty, we first calculated the mean RT by averaging the RT of the CCDL and CCDH. Then we used this mean RT to represent the creative insight score of each participant. Longer (shorter) RT indicated lower (higher) creative insight score. Finally, we computed the correlation between creative insight and ALFF across the whole brain to see which brain regions were linked to creative insight.

Previous task-fMRI studies suggested that the prefrontal cortex, STG and ACC may be important for creative insight [7, 11, 13–16]. Based on these findings, we hypothesized that individual differences in creative insight would be significantly correlated with the ALFF in some regions of the prefrontal cortex (e.g., SFG), STG, and ACC which have been linked to conflict detection and monitoring, spatially oriented processing, object-related exploration, reasoning, and affective function.

## Methods

### Participants

We recruited 62 right-handed and paid volunteers (28 M/34 F, aged 18–27 years old,  $21.02 \pm 2.08$  years old) in this study. Participants were healthy, had normal or corrected-to-normal vision, and reported no history of neurological or psychiatric disorders. The study protocol was approved by the Research Ethics Review Board of South China Normal University. Written informed consent was obtained from each participant prior to the study.

### Materials

Chinese characters are ideal examples of chunks because of its orthographic structure [35]. In the present study, we designed two types of creative Chinese character chunk decomposition,

(A) Creative chunk decomposition

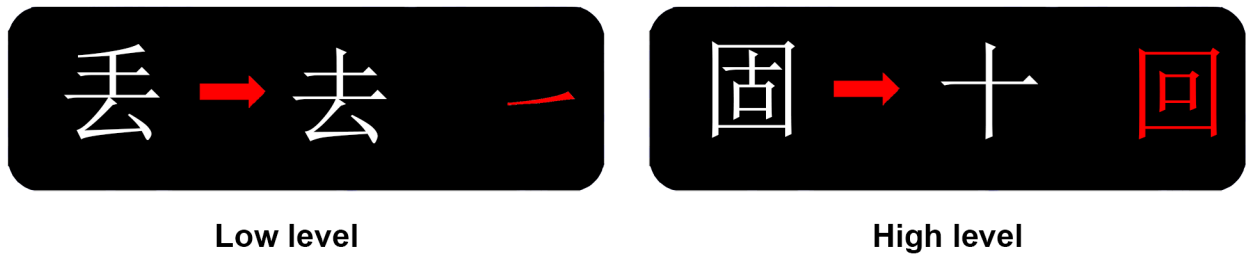

(B) Question phase      Answer phase

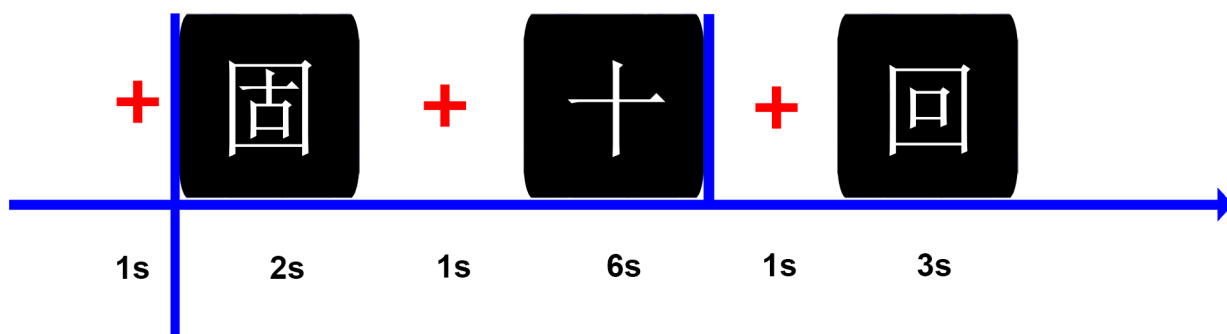

**Fig 1. Illustration of the Chinese character chunk decomposition materials and experiment procedure.** (A) Examples of two experimental conditions: creative chunk decomposition-low level; creative chunk decomposition-high level. Both conditions were defined by operational definitions (i.e., spatial relationship between the target character and the to-be-removed part or character) and novelty assessment. The to-be-removed part and character are also showed in red color on the right side. (B) The flowchart shows the time course of a trial in behavior experiment. In the question phase, participants were asked to find the to-be-removed portion in their minds, from transforming the given character into the target character as soon as possible. In the answer phase, the answer portion (a part or an intact character) was presented and participants were requested to confirm whether it was the same as the to-be-removed portion found in the question phase or not as soon as possible.

<https://doi.org/10.1371/journal.pone.0203071.g001>

CCDL and CCDH, based on both operational definition and novelty assessment by a separate sample of 20 participants on a 2-point scale (Fig 1). Specifically, in the CCDL, participants were required to transform a character into a new one by removing a specific part (e.g., a stroke), which was novel to participants but could be solved with a high probability of success. For example, participants were required to decompose the character “丢” (diu, meaning lost) into “去” (qu, meaning to go) by removing the stroke “口”. While in the CCDH, participants were asked to transform a character into a new one by removing an intact character (e.g., an isolated character), which was much more novel to participants and could be solved with a low probability of success. For example, participants were required to decompose the character “固” (gu, meaning stable) into “十” (shi, meaning ten) by removing the intact character “回” (hui, meaning to go back). Novelty assessment by paired-samples *t*-test showed that there was significant difference in novelty between the two types of creative Chinese character chunk decomposition [ $t(1,19) = -14.09, p < 0.001$ ]. The CCDH was much more novel and difficult than the CCDL. All Chinese characters selected as experimental materials in this study are frequently used characters.

Previous studies have confirmed the validity of using Chinese character chunk decomposition to investigate the creative insight [15, 34]. Creative insight is a sudden comprehension

that can lead to a new interpretation of a situation and yield the solution to a problem [1–4]. The Chinese character chunk decomposition task in the present study satisfied the definition of creative insight. For example, we first provided a character, such as “囧” (given character), and then we offered the second character, such as “十” (target character). Finally, participants were required to transform the given character into the target character, which constituted the insight problem in the study. Participants were searching the possible solutions in their minds. When they “suddenly” realized the solution to this problem, such as by removing the intact character (“回”) to transform the given character (“囧”) into the target character (“十”), they should respond as quickly as possible. This “sudden” solution comprehension and chunk decomposing process constituted the main body of insight process to some extent. Besides, the chunk decomposing involved deep representational change which played an important role in creative insight.

### Behavioral task and procedure

We designed two experimental conditions in this study: CCDH and CCDL (Fig 1). Each condition included 80 trials, and the total 160 trials were equally divided into 2 blocks, with a block consisting of 40 trials per condition. The order of the 2 blocks was counterbalanced across participants and trials were randomized in each block. Participants were asked to decompose parts or intact characters from given characters to constitute new characters (target characters). The experiment took place in a sound-attenuated booth. Participants sat in front of the computer screen with their hands located in front of the keyboard. The computer screen resolution was 1024 \* 768. The distance between the participant’s head and the screen was about 70 cm.

In each trial, the character need to be decomposed (given character) was presented on the screen for a fixed duration of 2 s and participants were asked to remember this character. After a 1 s fixation cross, another character (target character) was shown on the screen, and participants were required to transform the given character into the target character (insight problem) and find the solution to this problem in 6 s as soon as possible. In other words, participants had 6 s to find the to-be-removed portion and they were instructed to press a button as soon as they constructed the to-be-removed portion in their minds spontaneously, from decomposing the given character into the target character. Then, after a 1 s fixation cross, participants had to decide whether the portion found in their minds previously was the same as the portion (a part or an intact character) that appeared on the subsequent screen within 3 s by pressing a button as soon as possible. Before the experiment, participants performed a training with different stimuli than those used for the formal experiment (Fig 1).

After the behavioral experiment, all participants then underwent an MRI scan during which they were instructed to refrain from head movement and remain awake. The scan was comprised of anatomical imaging (5 min) and resting state imaging (8 min).

### Creative insight assessment

Previous studies have verified that chunk decomposition is a specific form of insightful problem-solving [8, 14, 15, 27–32]. In the present study, we adopted a revised Chinese character chunk decomposition task to assess the degree of creative insight in each participant. Specifically, for each participant, we first calculated the mean RT by averaging the RT of CCDL condition and the RT of CCDH condition. Then we used this mean RT to represent the creative insight score of each participant. Longer (shorter) RT indicated lower (higher) creative insight score. Previous studies have confirmed that it was reasonable to use RT as an index of creative insight [14, 16].

## MRI data acquisition

All images were acquired on a 3T Siemens Trio Tim MRI scanner in South China Normal University. For each participant, the rs-fMRI data, consisted of 240 images (8 mins), was acquired using a gradient-echo-planar imaging (EPI) sequence with the following parameters: repetition time (TR) = 2000 ms, echo time (TE) = 30 ms, thickness = 3.5 mm, field of view (FOV) =  $204 \times 204 \text{ mm}^2$ , flip angle (FA) =  $90^\circ$ , data matrix =  $64 \times 64$ , and 33 axial slices covering the whole brain. In addition, the high-resolution brain structural images were obtained using a T1-weighted 3D magnetization prepared rapid acquisition gradient echo (MP-RAGE) sequence with the following parameters: TR = 1900 ms, TE = 2.52 ms, FA =  $9^\circ$ , data matrix =  $256 \times 256$ , FOV =  $256 \times 256 \text{ mm}^2$ , thickness = 1.0 mm, and 176 sagittal slices covering the whole brain. During the rs-fMRI scan, each participant was requested to relax, close eyes and wake, but not thinking about other things.

## MRI data preprocessing

Data preprocessing and statistical analysis were performed using DPABI (<http://rfmri.org/dpabi>) [36] based on statistical parametric mapping (SPM8, <http://www.fil.ion.ucl.ac.uk/spm/software/spm8/>). For each participant, the first ten functional volumes were discarded to allow for scanner equilibration. The remaining images were corrected by slice-timing and realigned for head motion correction. Then, the realigned images were co-registered with the T1-weighted image and normalized to a voxel size of  $3 \times 3 \times 3 \text{ mm}^3$ , using a standard Montreal Neurological Institute (MNI) template. Afterward, the images were smoothed with a 4 mm full width at half maximum (FWHM) Gaussian kernel. At last, we performed signal linear detrending and regressed out the nuisance covariates, including head motion parameters derived from the Friston 24-parameter model, white matter signal, and cerebrospinal fluid signal within each voxel in whole brain. And we have not regressed out the global signal in this study. We estimated 6-parameter head motion and all of subjects satisfied our criteria: translation < 2.5 mm in any plane and angular rotation <  $2.5^\circ$  in any direction during realignment.

## Calculation of ALFF

We calculated the ALFF using the DPABI toolbox with the following steps: (1) For each voxel, the preprocessed time series was transformed to a frequency domain with a fast Fourier transform (FFT) (parameters: taper percent = 0, FFT length = shortest) and the power spectrum was then obtained. (2) The square root of the power spectrum was computed and then averaged across a predefined frequency interval. This averaged square root was termed ALFF at each voxel. The index of ALFF measures the absolute strength or intensity of low frequency oscillations. (3) For standardization purposes, the ALFF of each voxel was divided by the global mean ALFF value to reduce the global effects of variability across the participants [19].

## Statistical analyses

In behavior data analysis, a paired-samples *t*-test was used to assess the differences in novelty between the CCDL condition and CCDH condition, using SPSS software (version 19.0; SPSS, Chicago, IL, USA) and significant level was set at  $p < 0.01$  (two-sided). In rs-fMRI data analysis, data analysis was performed with SPM8. In the whole-brain analyses, a multiple linear regression was conducted by using creative insight (defined by mean RT) as the variable of interest to identify regions where ALFF was correlated with individual differences in the level of creative insight after controlling for possible confounding variables, such as age and sex. We



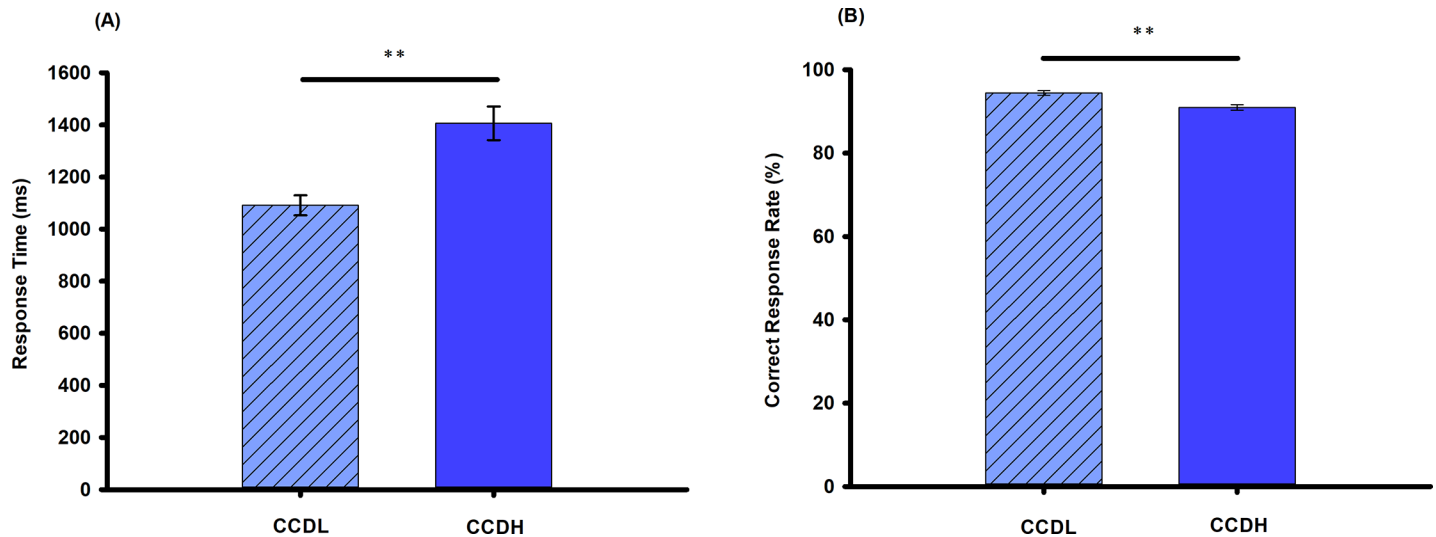

**Fig 2. Behavioral results.** Panel (A) shows the mean response time and (B) shows the mean correct response rate (%) in the creative chunk decomposition-low level (CCDL) and creative chunk decomposition-high level (CCDH). Error bars correspond to the standard error. The horizontal cap lines with “\*\*” represent  $p$ -value  $< 0.01$ .

<https://doi.org/10.1371/journal.pone.0203071.g002>

determined the surviving clusters at a voxel level threshold of  $p < 0.005$  (uncorrected) and cluster level threshold of  $p < 0.05$  (FWE corrected) to correct for multiple comparisons.

## Results

### Behavioral data

Details of the mean RT and correct rate (CR) of each experimental condition were showed on Fig 2. For RT, paired-samples  $t$ -test revealed that RT of CCDL was significantly longer than that of CCDH [ $t(61) = -9.04, p < 0.001$ ]. In addition, CR of CCDL was significantly higher than that of CCDH [ $t(61) = 4.81, p < 0.001$ ]. The behavioral data confirmed our predicted hypothesis.

To identify the degree of creative insight in each participant, we used the mean RT of both CCDL and CCDH conditions to represent the creative insight score. The kurtosis and skewness of the creative insight score ranged from  $-1$  to  $+1$ , indicating normality of the data [37]. There was no significant correlation between creative insight score and age ( $r = -0.25, p = 0.06$ ). And no significant sex difference was observed in the creative insight score [ $t(60) = 0.85, p = 0.40$ ].

### Resting-state fMRI data

In this study, we correlated the creative insight scores with the ALFF value of each voxel across the whole brain to explore the neural correlates of creative insight. After controlling for age and sex, the creative insight scores were significantly and positively associated with one cluster located in the right SFG. Moreover, the creative insight scores were significantly and negatively associated with four clusters located in the left middle cingulate cortex/insula cortex (MCC/IC), left STG/angular gyrus (AG), right ACC/caudate nucleus (CN), and culmen/declive (CU/DC). Details of these clusters were showed on Table 1 and Figs 3 and 4.

## Discussion

In this rs-fMRI research, we explored the potential contribution of spontaneous brain activity to creative insight. The analyses showed that creative insight scores were positively correlated

**Table 1. Brain regions showing significant correlation with creative insight.** Clusters were obtained at a voxel level threshold of  $p < 0.005$  (uncorrected) and cluster level threshold of  $p < 0.05$  (FWE corrected) to correct for multiple comparisons.

| Regions              | Side  | Cluster size<br>(voxels) | MNI coordinates |     |    | t value |
|----------------------|-------|--------------------------|-----------------|-----|----|---------|
|                      |       |                          | x               | y   | z  |         |
| Positive correlation |       |                          |                 |     |    |         |
| SFG                  | RH    | 55                       | 27              | -15 | 72 | 5.00    |
| Negative correlation |       |                          |                 |     |    |         |
| MCC/IC               | LH    | 336                      | -21             | 0   | 24 | -4.88   |
| STG/AG               | LH    | 98                       | -30             | -57 | 30 | -4.00   |
| ACC/CN               | RH    | 89                       | 18              | 12  | 21 | -4.73   |
| CU/DC                | L, RH | 66                       | 0               | -36 | -6 | -3.79   |

Coordinates are the stereotactic space of the Montreal Neurological Institute. The  $t$  value corresponds to the peak voxel showing greatest statistical difference within a cluster. Abbreviations: SFG, superior frontal gyrus; MCC, middle cingulate cortex; STG, superior temporal gyrus; ACC, anterior cingulate cortex; CU culmen; IC, insula cortex; AG, angular gyrus; CN, caudate nucleus; DC, declive; LH, left hemisphere; RH, right hemisphere.

<https://doi.org/10.1371/journal.pone.0203071.t001>

with ALFF in the SFG, while negatively correlated with ALFF in the MCC/IC, STG/AG, ACC/CN, and CU/DC, indicating that these brain regions were associated with creative insight.

These findings showed that creative insight scores were significantly positively correlated with ALFF in the SFG. Previous studies demonstrated the importance of SFG in executive functions, especially in working memory, mental manipulation, and spatially oriented processing [38, 39]. Furthermore, another previous study indicated that the SFG supported planning and motivation [40]. In addition, previous studies have suggested that the creative insight was linked to mental manipulation, task-related associations [10, 34]. For example, previous studies showed that representation change, and forming task-related associations were the crucial process of creative insight [10, 34]. Therefore, in the present study, the result that ALFF in the SFG predicted creative insight significantly may indicate a stable relationship between creative insight and representation change and forming task-related associations. Moreover, in a task-fMRI study, Huang et al. [14] found that the SFG was activated in insight problem-solving, which was partially consistent with our current study.

We also detected that creative insight was negatively linked with ALFF in the cingulate cortex, including the ACC and MCC. The ACC extends across CN and the MCC extends across IC in the present study. The ACC emerged as a hub region of conflict detection, restructuring processes, performance monitoring, and affective functions [14, 41, 42]. Similarly, the MCC has been suggested to be involved in response selection, monitoring and affective processing [43, 44]. Furthermore, previous studies have indicated that the creative insight was related to inhibiting the predominant irrelevant mental representations, establishing the new representation in a goal-directed way, and positive emotional experience [11, 45]. For instance, Bowden and Jung-Beeman [46] found that problem solvers experienced their solutions of insightful problems as sudden and surprising, which called the “Aha! moment”. Subramaniam et al. [11] emphasized that problem solvers were required to detect competing solution candidates, rely less on dominant associations, and break and establish set to solve the insight problem. Thus, the finding that ALFF in the ACC and MCC predicted creative insight may suggest a relationship between creative insight and conflict monitoring, breaking and establish mental sets, and emotional experience. In addition, we also found creative insight was negatively correlated with ALFF in the CN and IC. The CN was the core region of the procedural memory system [46, 47], and could be related to the habit formation [48], novelty assessment [15], and sequence learning [49]. The role of the IC could be related to emotional experience, and



(A) Brain regions exhibiting positive correlation with creative insight

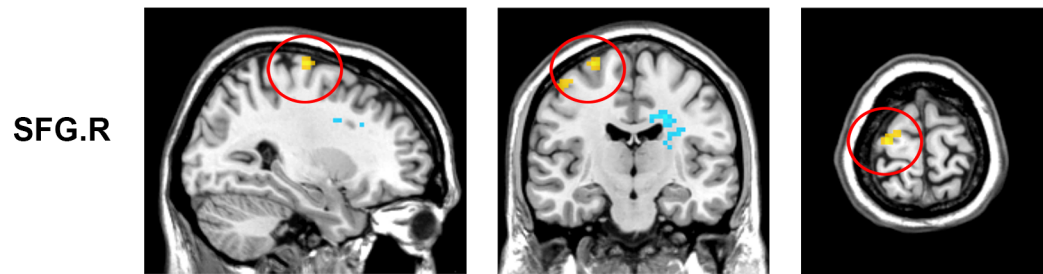

(B) Brain regions exhibiting negative correlation with creative insight

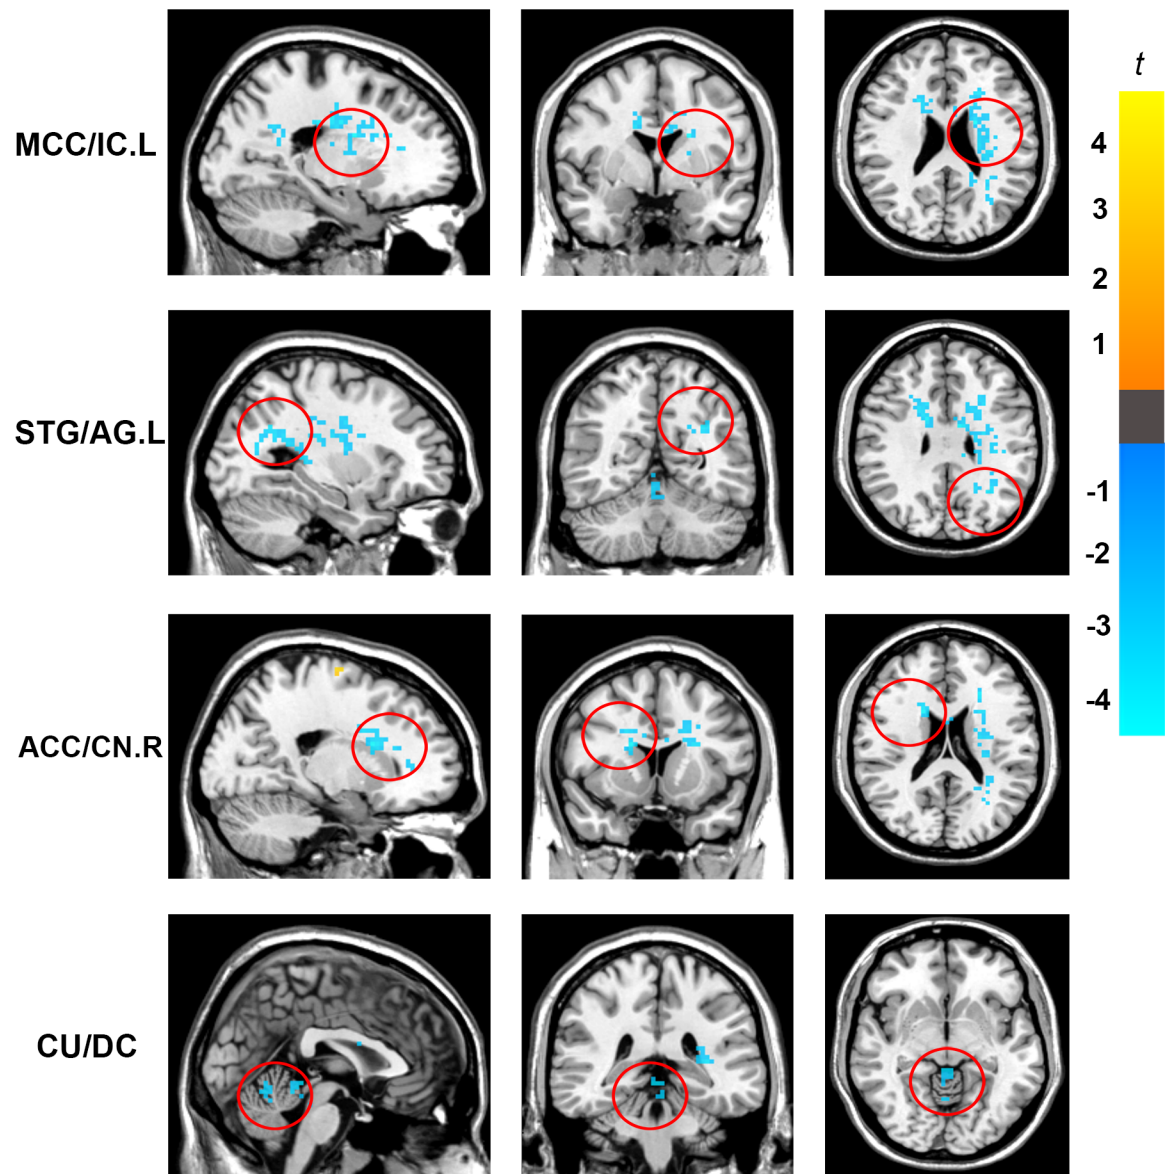

**Fig 3. Brain regions showing significant correlation with creative insight.** Activation maps are shown at a voxel level threshold of  $p < 0.005$  (uncorrected), and cluster level threshold of  $p < 0.05$  (FWE corrected). Images are plotted with the MRICron (<https://www.mricron.com/>).

[nitrc.org/projects/mricron](https://doi.org/10.1371/journal.pone.0203071)). (A) ALFF of the right SFG was positively correlated with the creative insight. (B) ALFF of the left MCC/IC, left STG/AG, right ACC/CN, and CU/DC was negatively correlated with the creative insight. Abbreviations: ALFF, amplitude of low-frequency fluctuation; SFG, superior frontal gyrus; MCC, middle cingulate cortex; STG, superior temporal gyrus; ACC, anterior cingulate cortex; CU culmen; IC, insula cortex; AG, angular gyrus; CN, caudate nucleus; DC, declive.

<https://doi.org/10.1371/journal.pone.0203071.g003>

processing uncertainty in the context of decision making [50]. Previous studies indicated that problem solvers come to an impasse, when trying to solve an insight problem, perhaps because they were misled by ambiguous information in the problem [45, 51]. Moreover, creative insight included processes to break mental sets and to form new task-related associations [52]. Thus, the activations in IC and CN could be related to emotional experience, novelty assessment, and forming novel associations in the insight problem-solving. Our findings were consistent with previous task-related fMRI studies of creative insight [11, 13–15]. In a word, ALFF of the resting-state brain activity could predict creative insight.

In addition, we also found that creative insight was negatively correlated with ALFF in the STG and the CU. In the present study, the STG extends across AG, and the CU includes parts of the DC. The STG played a critical role in representing spatial awareness, and object-related exploration [53, 54]. The AG was an association area related to manipulate mental representations, reasoning and comprehension [55, 56]. The STG and AG activations indicated that insight problem solving required more efforts, including information comparison, solution exploration and selection, and reasoning, which was in line with previous studies of insight problem-solving [13, 45]. Therefore, the result that ALFF in the STG and AG predicted creative insight significantly may indicate a relationship between creative insight and object-related exploration and reasoning. The regions of CU and DC, which belong to cerebellum, have been previously reported to be related to language processing [57, 58]. Previous studies demonstrated that participants with a high creative performance showed significantly greater neural activity in the cerebellum, including the CU and DC, which was consistent with our findings in the present research [59, 60]. In this study, we used the Chinese character chunk decomposition as the experiment materials, which would probably recruit the language processing, then activate the CU and DC. However, it is noteworthy that the explanation of the above activated brain regions was based on findings from previous studies. Further research is needed to explore this possibility in greater detail.

Finally, with the task of creative chunk decomposition in this rs-fMRI study, we sketched a preliminary model of creative insight which defines the functional role of each region. We speculated that the activations in the STG and AG involved in exploring, reasoning, and looking for the insightful solution which is meaningful and target-related at the same time. The ACC, MCC and SFG were related to inhibiting the predominant irrelevant task representations, restructuring the representations in a goal-directed way, and established the novel representations. Furthermore, the activations in the ACC, MCC and IC could also be partly related to the “Aha!” experience accompanied with insight problem solving. CN played an important role in the evaluation of novel and insightful solutions and forming novel associations in creative insight.

There was a limitation in the present study. For each participant, we defined the degree of creative insight by the mean RT of both creative chunk decompositions, which was controversial. This approach was reasonable to some extent since lower creative insight score of the participant indicated more difficulty and longer RT in the chunk decomposition. And previous studies of chunk decomposition have demonstrated the validity of RT as an index partly reflecting the extent of creative insight [14, 15, 33]. However, the RT might simply reflect the task difficulty, not insight itself. Thus, in the study, we also used the mean CR to characterize

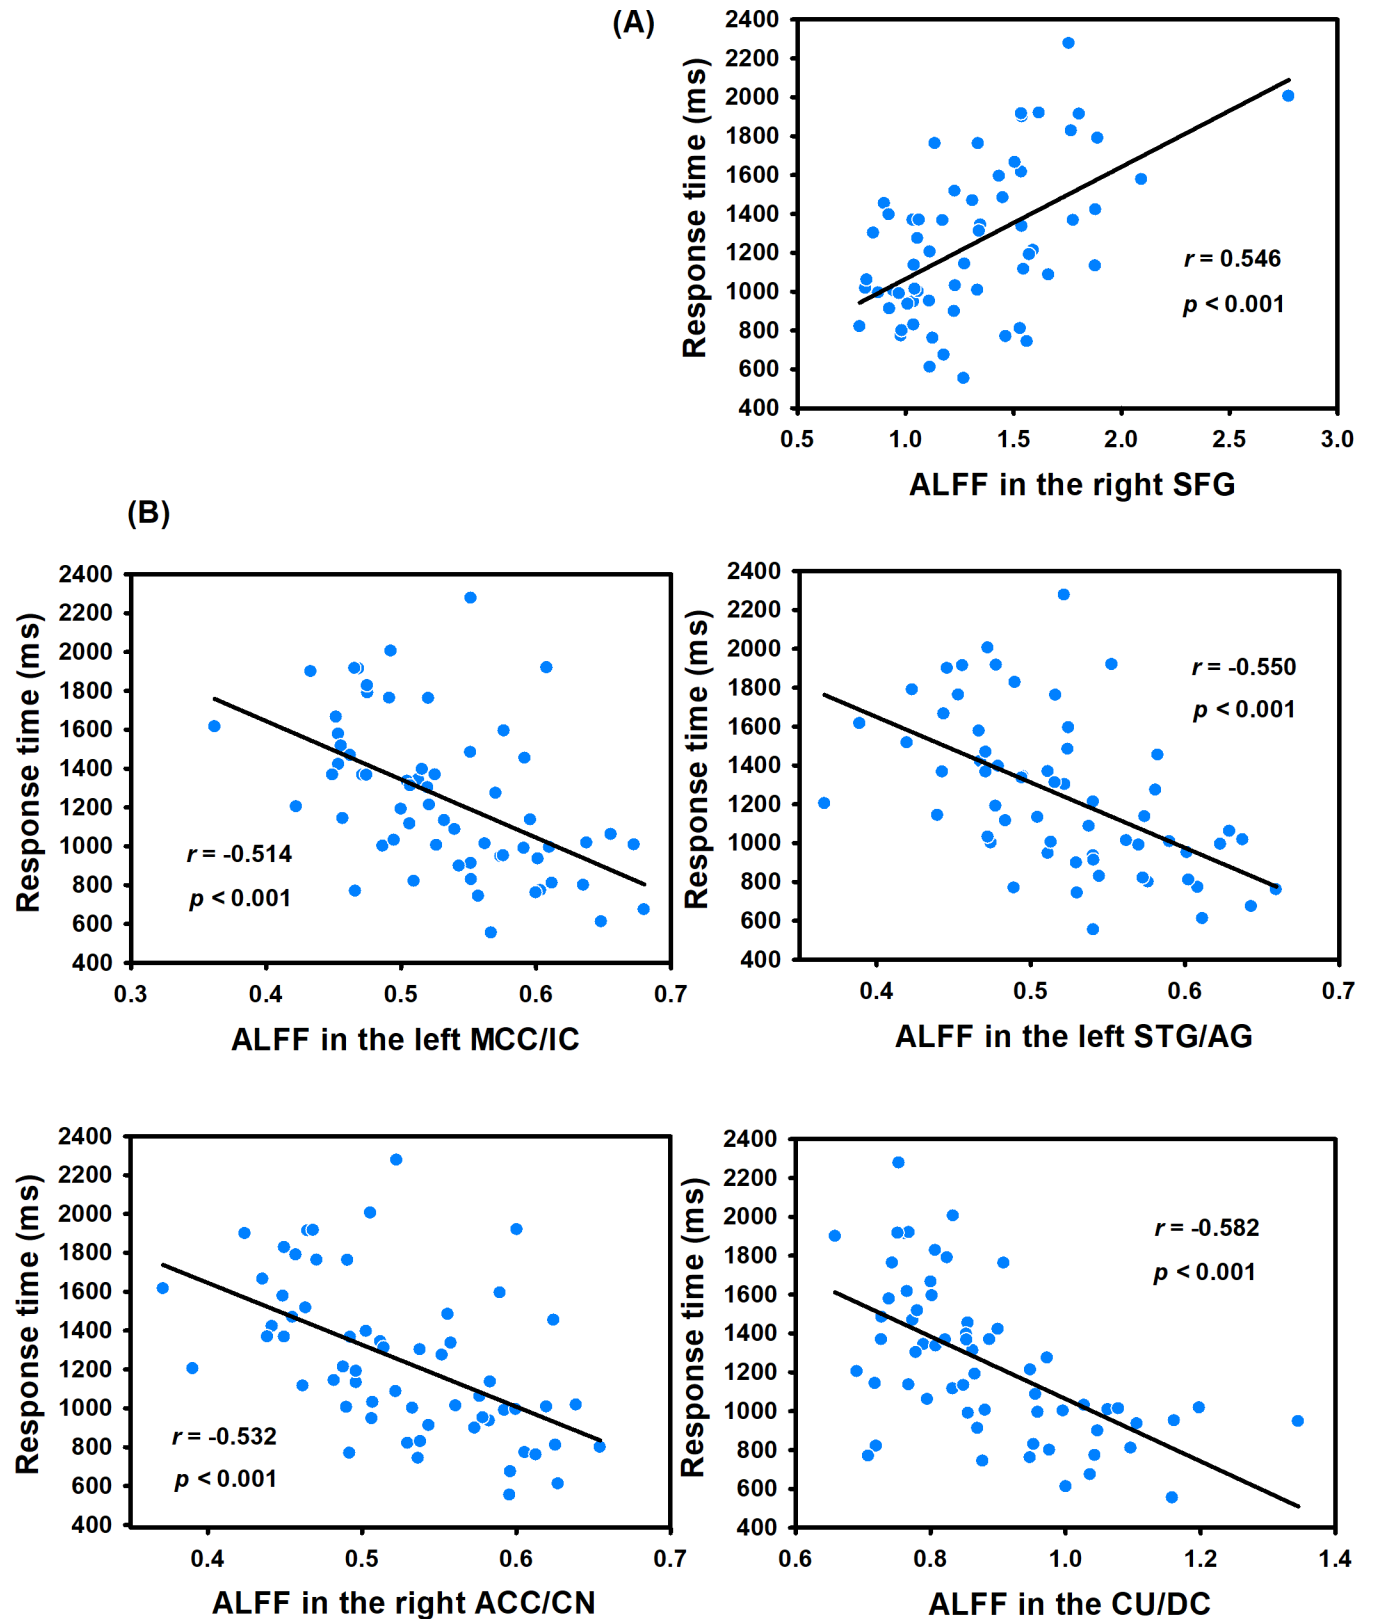

Fig 4. The scatterplot showed correlation between creative insight scores (defined by the mean response time of both creative chunks decomposition) and ALFF. (A) Creative insight scores were positively correlated with ALFF in the right SFG. (B) Creative insight scores were negatively correlated with ALFF

in the left MCC/IC, left STG/AG, right ACC/CN, and CU/DC. Abbreviations: ALFF, amplitude of low-frequency fluctuation; SFG, superior frontal gyrus; MCC, middle cingulate cortex; STG, superior temporal gyrus; ACC, anterior cingulate cortex; CU, culmen; IC, insula cortex; AG, angular gyrus; CN, caudate nucleus; DC, declive.

<https://doi.org/10.1371/journal.pone.0203071.g004>

the degree of creative insight. Higher (lower) CR indicated higher (lower) creative insight score. However, results of the whole brain analysis showed that only one cluster of middle occipital gyrus was significantly correlated with the creative insight. The reason for this might be that all the participants had a relative high CR in the study. Using the CR as the index might be possibly hard to represent the individual variations in the degree of creative insight. It seems that RT might be a more sensitive index of creative insight than CR. In the future, a more accurate index or task is needed to characterize the creative insight.

In conclusion, using the rs-fMRI and chunk decomposition paradigm, we explored the neural correlates of creative insight. The findings demonstrate that ALFF in the SFG, MCC/IC, STG/AG, ACC/CN and CU/DC can be used to predict individual differences in creative insight. Furthermore, the ACC, MCC and IC are implicated in emotional experience in creative insight. The ACC, MCC and SFG involved in conflict monitoring, breaking mental sets, and forming task-related associations. The STG and AG were responsible for exploring, reasoning, and looking for insightful solutions, with an evaluation of novel solutions by the CN. In a word, the present study is conducive to further understand the cognitive processing and neural correlates of creative insight.

## Supporting information

**S1 File. Illustration of the experiment behavior data and fMRI data.** (A) Behavior data showed the gender and age of each participant and the RT, CR in the CCDL and CCDH condition of each participant. (B) fMRI data showed the mean ALFF brain map of each participant. Abbreviations: RT, response time; CR, correct rate; CCDL, creative chunk decomposition-low level; CCDH, creative chunk decomposition-high level; ALFF, amplitude of low-frequency fluctuation. (ZIP)

## Acknowledgments

This work was supported by the funding from the National Social Science Foundation of China (Grant Number: 14ZDB159) and Project of Key Institute of Humanities and Social Sciences, MOE (16JJD880025).

## Author Contributions

**Data curation:** Xiaoying Dai, Yajue Chen.

**Project administration:** Xuan Cui.

**Software:** Jiabao Lin.

**Supervision:** Lei Mo.

**Writing – original draft:** Jiabao Lin.

**Writing – review & editing:** Lei Mo.

## References

1. Sternberg RJ, Davidson JE. The nature of insight: The MIT Press; 1995.

2. Kounios J, Beeman M. The Aha! moment: The cognitive neuroscience of insight. *Current directions in psychological science*. 2009; 18(4):210–6.
3. Kounios J, Frymiare JL, Bowden EM, Fleck JL, Subramaniam K, Parrish TB, et al. The prepared mind: Neural activity prior to problem presentation predicts subsequent solution by sudden insight. *Psychological science*. 2006; 17(10):882–90. <https://doi.org/10.1111/j.1467-9280.2006.01798.x> PMID: 17100789
4. Webb ME, Little DR, Cropper SJ. Insight is not in the problem: Investigating insight in problem solving across task types. *Frontiers in psychology*. 2016; 7:1424. <https://doi.org/10.3389/fpsyg.2016.01424> PMID: 27725805
5. Dietrich A, Kanso R. A review of EEG, ERP, and neuroimaging studies of creativity and insight. *Psychological bulletin*. 2010; 136(5):822. <https://doi.org/10.1037/a0019749> PMID: 20804237
6. Yang W, Dietrich A, Liu P, Ming D, Jin Y, Nusbaum HC, et al. Prototypes are key heuristic information in insight problem solving. *Creativity Research Journal*. 2016; 28(1):67–77.
7. Jung-Beeman M, Bowden EM, Haberman J, Frymiare JL, Arambel-Liu S, Greenblatt R, et al. Neural activity when people solve verbal problems with insight. *PLoS biology*. 2004; 2(4):e97. <https://doi.org/10.1371/journal.pbio.0020097> PMID: 15094802
8. Öllinger M, Jones G, Knoblich G. Investigating the effect of mental set on insight problem solving. *Experimental psychology*. 2008; 55(4):269. <https://doi.org/10.1027/1618-3169.55.4.269> PMID: 18683624
9. Amabile TM. A model of creativity and innovation in organizations. *Research in organizational behavior*. 1988; 10(1):123–67.
10. Kershaw TC, Ohlsson S. Multiple causes of difficulty in insight: the case of the nine-dot problem. *Journal of experimental psychology: learning, memory, and cognition*. 2004; 30(1):3. <https://doi.org/10.1037/0278-7393.30.1.3> PMID: 14736292
11. Subramaniam K, Kounios J, Parrish TB, Jung-Beeman M. A brain mechanism for facilitation of insight by positive affect. *Journal of cognitive neuroscience*. 2009; 21(3):415–32. <https://doi.org/10.1162/jocn.2009.21057> PMID: 18578603
12. Qiu J, Li H, Jou J, Liu J, Luo Y, Feng T, et al. Neural correlates of the “Aha” experiences: evidence from an fMRI study of insight problem solving. *cortex*. 2010; 46(3):397–403. <https://doi.org/10.1016/j.cortex.2009.06.006> PMID: 19656506
13. Zhao Q, Zhou Z, Xu H, Chen S, Xu F, Fan W, et al. Dynamic neural network of insight: a functional magnetic resonance imaging study on solving Chinese ‘chengyu’ riddles. *PloS one*. 2013; 8(3):e59351. <https://doi.org/10.1371/journal.pone.0059351> PMID: 23555020
14. Huang F, Fan J, Luo J. The neural basis of novelty and appropriateness in processing of creative chunk decomposition. *Neuroimage*. 2015; 113:122–32. <https://doi.org/10.1016/j.neuroimage.2015.03.030> PMID: 25797834
15. Tang X, Pang J, Nie Q-Y, Conci M, Luo J, Luo J. Probing the cognitive mechanism of mental representational change during chunk decomposition: A parametric fMRI study. *Cerebral Cortex*. 2015; 26(7):2991–9. <https://doi.org/10.1093/cercor/bhv113> PMID: 26045566
16. Wu L, Knoblich G, Luo J. The role of chunk tightness and chunk familiarity in problem solving: evidence from ERPs and fMRI. *Human brain mapping*. 2013; 34(5):1173–86. <https://doi.org/10.1002/hbm.21501> PMID: 22328466
17. Kumari V, Williams SC, Gray JA. Personality predicts brain responses to cognitive demands. *Journal of Neuroscience*. 2004; 24(47):10636–41. <https://doi.org/10.1523/JNEUROSCI.3206-04.2004> PMID: 15564579
18. Thatcher RW, North D, Biver C. EEG and intelligence: relations between EEG coherence, EEG phase delay and power. *Clinical neurophysiology*. 2005; 116(9):2129–41. <https://doi.org/10.1016/j.clinph.2005.04.026> PMID: 16043403
19. Yu-Feng Z, Yong H, Chao-Zhe Z, Qing-Jiu C, Man-Qiu S, Meng L, et al. Altered baseline brain activity in children with ADHD revealed by resting-state functional MRI. *Brain and Development*. 2007; 29(2):83–91. <https://doi.org/10.1016/j.braindev.2006.07.002> PMID: 16919409
20. Mennes M, Kelly C, Zuo X-N, Di Martino A, Biswal BB, Castellanos FX, et al. Inter-individual differences in resting-state functional connectivity predict task-induced BOLD activity. *Neuroimage*. 2010; 50(4):1690–701. <https://doi.org/10.1016/j.neuroimage.2010.01.002> PMID: 20079856
21. Fox MD, Raichle ME. Spontaneous fluctuations in brain activity observed with functional magnetic resonance imaging. *Nature reviews neuroscience*. 2007; 8(9):700. <https://doi.org/10.1038/nrn2201> PMID: 17704812
22. Kunisato Y, Okamoto Y, Okada G, Aoyama S, Nishiyama Y, Onoda K, et al. Personality traits and the amplitude of spontaneous low-frequency oscillations during resting state. *Neuroscience Letters*. 2011; 492(2):109–13. <https://doi.org/10.1016/j.neulet.2011.01.067> PMID: 21291958



23. Huang X-Q, Lui S, Deng W, Chan RC, Wu Q-Z, Jiang L-J, et al. Localization of cerebral functional deficits in treatment-naive, first-episode schizophrenia using resting-state fMRI. *Neuroimage*. 2010; 49(4):2901–6. <https://doi.org/10.1016/j.neuroimage.2009.11.072> PMID: 19963069
24. Zuo X-N, Xing X-X. Test-retest reliabilities of resting-state FMRI measurements in human brain functional connectomics: a systems neuroscience perspective. *Neuroscience & Biobehavioral Reviews*. 2014; 45:100–18.
25. Yin Y, Li L, Jin C, Hu X, Duan L, Eyler LT, et al. Abnormal baseline brain activity in posttraumatic stress disorder: a resting-state functional magnetic resonance imaging study. *Neuroscience letters*. 2011; 498(3):185–9. <https://doi.org/10.1016/j.neulet.2011.02.069> PMID: 21376785
26. Han Y, Wang J, Zhao Z, Min B, Lu J, Li K, et al. Frequency-dependent changes in the amplitude of low-frequency fluctuations in amnesic mild cognitive impairment: a resting-state fMRI study. *Neuroimage*. 2011; 55(1):287–95. <https://doi.org/10.1016/j.neuroimage.2010.11.059> PMID: 21118724
27. Knoblich G, Ohlsson S, Raney GE. An eye movement study of insight problem solving. *Memory & cognition*. 2001; 29(7):1000–9.
28. Ohlsson S. Information-processing explanations of insight and related phenomena. *Advances in the psychology of thinking*. 1992; 1:1–44.
29. Dreu CKD, Nijstad BA, Baas M. Behavioral activation links to creativity because of increased cognitive flexibility. *Social Psychological and Personality Science*. 2011; 2(1):72–80.
30. Scott WA. Cognitive complexity and cognitive flexibility. *Sociometry*. 1962:405–14.
31. Wu L, Knoblich G, Wei G, Luo J. How perceptual processes help to generate new meaning: An EEG study of chunk decomposition in Chinese characters. *Brain research*. 2009; 1296:104–12. <https://doi.org/10.1016/j.brainres.2009.08.023> PMID: 19695234
32. Nijstad BA, De Dreu CK, Rietzschel EF, Baas M. The dual pathway to creativity model: Creative ideation as a function of flexibility and persistence. *European Review of Social Psychology*. 2010; 21(1):34–77.
33. Knoblich G, Ohlsson S, Haider H, Rhenius D. Constraint relaxation and chunk decomposition in insight problem solving. *Journal of Experimental Psychology: Learning, memory, and cognition*. 1999; 25(6):1534.
34. Luo J, Niki K, Knoblich G. Perceptual contributions to problem solving: Chunk decomposition of Chinese characters. *Brain research bulletin*. 2006; 70(4):430–43.
35. Tan LH, Liu H-L, Perfetti CA, Spinks JA, Fox PT, Gao J-H. The neural system underlying Chinese logograph reading. *Neuroimage*. 2001; 13(5):836–46. <https://doi.org/10.1006/nimg.2001.0749> PMID: 11304080
36. Yan C, Zang Y. DPARSF: a MATLAB toolbox for "pipeline" data analysis of resting-state fMRI. *Frontiers in systems neuroscience*. 2010; 4:13. <https://doi.org/10.3389/fnsys.2010.00013> PMID: 20577591
37. Marcoulides GA, Hershberger SL. *Multivariate statistical methods: A first course*: Psychology Press; 1997.
38. Boisgueheneuc Fd, Levy R, Volle E, Seassau M, Duffau H, Kinkingnehun S, et al. Functions of the left superior frontal gyrus in humans: a lesion study. *Brain*. 2006; 129(12):3315–28.
39. Goldman-Rakic PS. Circuitry of primate prefrontal cortex and regulation of behavior by representational memory. *Comprehensive Physiology*. 1987.
40. Rose JE, McClemon FJ, Froeliger B, Behm FM, Preud'homme X, Krystal AD. Repetitive transcranial magnetic stimulation of the superior frontal gyrus modulates craving for cigarettes. *Biological psychiatry*. 2011; 70(8):794–9. <https://doi.org/10.1016/j.biopsych.2011.05.031> PMID: 21762878
41. Fan J, Hof PR, Guise KG, Fossella JA, Posner MI. The functional integration of the anterior cingulate cortex during conflict processing. *Cerebral Cortex*. 2007; 18(4):796–805. <https://doi.org/10.1093/cercor/bhm125> PMID: 17652463
42. Radua J, Borgwardt S, Crescini A, Mataix-Cols D, Meyer-Lindenberg A, McGuire P, et al. Multimodal meta-analysis of structural and functional brain changes in first episode psychosis and the effects of antipsychotic medication. *Neuroscience & Biobehavioral Reviews*. 2012; 36(10):2325–33.
43. Kulkarni B, Bentley D, Elliott R, Youell P, Watson A, Derbyshire S, et al. Attention to pain localization and unpleasantness discriminates the functions of the medial and lateral pain systems. *European Journal of Neuroscience*. 2005; 21(11):3133–42. <https://doi.org/10.1111/j.1460-9568.2005.04098.x> PMID: 15978022
44. Frith C. A framework for studying the neural basis of attention. *Neuropsychologia*. 2001; 39(12):1367–71. PMID: 11566318
45. Bowden EM, Jung-Beeman M. Aha! Insight experience correlates with solution activation in the right hemisphere. *Psychonomic bulletin & review*. 2003; 10(3):730–7.



46. Seger CA. The basal ganglia in human learning. *The Neuroscientist*. 2006; 12(4):285–90. <https://doi.org/10.1177/1073858405285632> PMID: 16840704
47. Barnes TD, Kubota Y, Hu D, Jin DZ, Graybiel AM. Activity of striatal neurons reflects dynamic encoding and recoding of procedural memories. *Nature*. 2005; 437(7062):1158. <https://doi.org/10.1038/nature04053> PMID: 16237445
48. Graybiel AM. Habits, rituals, and the evaluative brain. *Annu Rev Neurosci*. 2008; 31:359–87. <https://doi.org/10.1146/annurev.neuro.29.051605.112851> PMID: 18558860
49. Boyd L, Edwards J, Siengsukon C, Vidoni E, Wessel B, Lindsell M. Motor sequence chunking is impaired by basal ganglia stroke. *Neurobiology of learning and memory*. 2009; 92(1):35–44. <https://doi.org/10.1016/j.nlm.2009.02.009> PMID: 19249378
50. Singer T, Critchley HD, Preuschoff K. A common role of insula in feelings, empathy and uncertainty. *Trends in cognitive sciences*. 2009; 13(8):334–40. <https://doi.org/10.1016/j.tics.2009.05.001> PMID: 19643659
51. Smith SM. Getting into and out of mental ruts: A theory of fixation, incubation, and insight. 1995.
52. Bowden EM, Jung-Beeman M. Methods for investigating the neural components of insight. *Methods*. 2007; 42(1):87–99. <https://doi.org/10.1016/j.ymeth.2006.11.007> PMID: 17434419
53. Ellison A, Schindler I, Pattison LL, Milner AD. An exploration of the role of the superior temporal gyrus in visual search and spatial perception using TMS. *Brain*. 2004; 127(10):2307–15.
54. Karnath H-O. New insights into the functions of the superior temporal cortex. *Nature Reviews Neuroscience*. 2001; 2(8):568. <https://doi.org/10.1038/35086057> PMID: 11484000
55. Seghier ML. The angular gyrus: multiple functions and multiple subdivisions. *The Neuroscientist*. 2013; 19(1):43–61. <https://doi.org/10.1177/1073858412440596> PMID: 22547530
56. Seghier ML, Fagan E, Price CJ. Functional subdivisions in the left angular gyrus where the semantic system meets and diverges from the default network. *Journal of Neuroscience*. 2010; 30(50):16809–17. <https://doi.org/10.1523/JNEUROSCI.3377-10.2010> PMID: 21159952
57. Pernet CR, Poline JB, Demonet JF, Rousselet GA. Brain classification reveals the right cerebellum as the best biomarker of dyslexia. *BMC neuroscience*. 2009; 10(1):67.
58. Chavez RA. Imagery As a Core Process in the Creativity of Successful and Awarded Artists and Scientists and Its Neurobiological Correlates. *Frontiers in psychology*. 2016; 7:351. <https://doi.org/10.3389/fpsyg.2016.00351> PMID: 27014157
59. Chávez-Eakle RA, Graff-Guerrero A, García-Reyna J-C, Vaugier V, Cruz-Fuentes C. Cerebral blood flow associated with creative performance: a comparative study. *Neuroimage*. 2007; 38(3):519–28. <https://doi.org/10.1016/j.neuroimage.2007.07.059> PMID: 17884587
60. Gonen-Yaacovi G, De Souza LC, Levy R, Urbanski M, Josse G, Volle E. Rostral and caudal prefrontal contribution to creativity: a meta-analysis of functional imaging data. *Frontiers in human neuroscience*. 2013; 7:465. <https://doi.org/10.3389/fnhum.2013.00465> PMID: 23966927
